# Supplementary material
Source: MDPI journal article supplement (https://www.mdpi.com/2073-445X/10/7/686)
Supplement: s1 [file s1]

**Supplementary Information 2.** Results of combined the estimates from the five imputed data sets estimates were pooled from the five complete data models, the variance computed over the repeated analyses by Rubin's rules (Rubin, 1987, p. 76). We calculated degrees of freedom for the pooled estimates employing the Barnard-Rubin adjustment (Barnard and Rubin, 1999).

**Supplementary Table 1.** Regression results for whether a Commissioner has enacted a burn ban.

| term                    | log odds | std. error | statistic | degrees of freedom | p.value     |
|-------------------------|----------|------------|-----------|--------------------|-------------|
| (Intercept)             | 26.46    | 7,634.27   | 0.00      | 113.04             | 1.00        |
| Somewhat Familiar       | -7.64    | 7,291.85   | 0.00      | 113.04             | 1.00        |
| Moderately Familiar     | 1.07     | 5,618.84   | 0.00      | 113.04             | 1.00        |
| Very Familiar           | -14.24   | 3,157.79   | 0.00      | 113.04             | 1.00        |
| Participated in RX Fire | 0.29     | 1.40       | 0.21      | 96.12              | 0.84        |
| Comfort with RX fire    | 0.19     | 0.85       | 0.22      | 86.62              | 0.83        |
| Rural Land Owner        | -0.27    | 1.27       | -0.21     | 76.68              | 0.83        |
| Years as Commissioner   | 0.73     | 0.34       | 2.14      | 110.40             | <b>0.03</b> |
| Female                  | -19.83   | 7,098.53   | 0.00      | 113.04             | 1.00        |

**Supplementary Table 2.** Regression results for whether a Commissioner is aware there are exemptions for burning during burn bans.

| term                    | log odds | std. error | statistic | degrees of freedom | p.value     |
|-------------------------|----------|------------|-----------|--------------------|-------------|
| (Intercept)             | -2.44    | 1.41       | -1.74     | 90.42              | 0.09        |
| Comfort with RX fire    | 0.62     | 0.30       | 2.05      | 57.64              | <b>0.05</b> |
| Somewhat Familiar       | -0.92    | 0.96       | -0.95     | 82.98              | 0.34        |
| Moderately Familiar     | 0.23     | 0.75       | 0.31      | 47.79              | 0.76        |
| Very Familiar           | -0.23    | 0.46       | -0.50     | 82.12              | 0.62        |
| Participated in RX Fire | 0.63     | 0.49       | 1.28      | 79.15              | 0.20        |
| Rural Land Owner        | 0.22     | 0.48       | 0.45      | 108.18             | 0.65        |
| Years as Commissioner   | 0.05     | 0.04       | 1.28      | 65.40              | 0.21        |
| Female                  | 0.06     | 0.88       | 0.06      | 50.04              | 0.95        |

**Supplementary Table 3.** Regression results for comfort with prescribed fire.

| term                    | log odds | std.error | statistic | degrees of freedom | p.value     |
|-------------------------|----------|-----------|-----------|--------------------|-------------|
| Familiarity with fire   | 0.57     | 0.24      | 2.31      | 107.62             | <b>0.02</b> |
| Participated in RX Fire | 0.03     | 0.40      | 0.06      | 93.67              | 0.95        |
| Rural Land Owner        | 0.86     | 0.43      | 2.01      | 94.94              | <b>0.05</b> |
| Years as Commissioner   | -0.03    | 0.03      | -0.93     | 108.11             | 0.35        |
| Female                  | 0.48     | 0.67      | 0.72      | 97.97              | 0.47        |

**Supplementary Table 4.** Regression results for Commissioners' thoughts that a shift in the liability standard for escaped prescribed fire from simple to gross negligence would result in an increase in pressure from the public to enact burn bans.

| term                    | log odds | std.error | statistic | degrees of freedom | p.value |
|-------------------------|----------|-----------|-----------|--------------------|---------|
| (Intercept)             | -0.59    | 1.66      | -0.36     | 35.33              | 0.72    |
| Comfort with RX fire    | -0.24    | 0.32      | -0.75     | 47.54              | 0.46    |
| Participated in RX Fire | -0.74    | 0.56      | -1.33     | 59.59              | 0.19    |

|                       |       |      |       |        |      |
|-----------------------|-------|------|-------|--------|------|
| Somewhat Familiar     | 0.17  | 0.94 | 0.18  | 107.36 | 0.86 |
| Moderately Familiar   | -0.12 | 0.71 | -0.16 | 94.68  | 0.87 |
| Very Familiar         | 0.48  | 0.50 | 0.96  | 77.39  | 0.34 |
| Years as Commissioner | -0.01 | 0.04 | -0.30 | 98.08  | 0.76 |
| Rural Land Owner      | 0.71  | 0.64 | 1.10  | 49.16  | 0.28 |
| Female                | 0.15  | 0.93 | 0.16  | 78.73  | 0.88 |

**Supplementary Table 5.** Regression results for whether a Commissioner said that a shift in liability for escaped prescribed fire cases from simple to gross negligence would result in a change in the frequency with which they enact burn bans.

| term                                       | log odds | std.error | statistic | degrees<br>of<br>freedom | p.value         |
|--------------------------------------------|----------|-----------|-----------|--------------------------|-----------------|
| (Intercept)                                | -3.71    | 1.85      | -2.00     | 66.19                    | 0.05            |
| Comfort with Rx fire                       | 0.18     | 0.34      | 0.54      | 80.83                    | 0.59            |
| Thinking pressure from public would change | 2.39     | 0.55      | 4.38      | 92.08                    | <b>&lt;0.01</b> |
| Somewhat Familiar                          | -0.21    | 1.16      | -0.18     | 92.34                    | 0.85            |
| Moderately Familiar                        | -0.09    | 0.84      | -0.11     | 109.22                   | 0.91            |
| Very Familiar                              | 0.11     | 0.54      | 0.21      | 95.44                    | 0.83            |
| Participated in Rx Fire                    | 0.06     | 0.65      | 0.09      | 22.28                    | 0.93            |
| Years as Commissioner                      | -0.03    | 0.04      | -0.95     | 99.95                    | 0.34            |
| Rural Land Owner                           | 0.37     | 0.74      | 0.50      | 21.99                    | 0.62            |
| Female                                     | 1.42     | 1.26      | 1.13      | 62.52                    | 0.26            |
